# Supplementary material for: Weekend Surgical Care and Postoperative Mortality: A Systematic Review and Meta-Analysis of Cohort Studies
Source: PubMed Central journal article supplement — Med Care. 2017 Dec 14;56(2):121–9. doi: 10.1097/MLR.0000000000000860 (PMC5770102; doi:10.1097/mlr.0000000000000860), 2017-12-14

## Supplementary Online Content

eTable 1. Complete PubMed and EMBASE search strategies

eTable 2. Criteria for classifying risk of bias

eTable 3. Risk of bias assessment

eFigure 1. Study selection flowchart

eFigures 2-4. Elective surgery sensitivity analyses incorporating results of smaller cohorts in the place of larger cohorts included in the main analysis that potentially included duplicate patients

eFigures 5-7. Urgent/emergent surgery sensitivity analyses incorporating results of smaller cohorts in the place of larger cohorts included in the main analysis that potentially included duplicate patients

eFigure 8. Funnel plots of log odds ratios for mortality after elective surgery on Friday relative to Monday (A) and after admission for urgent/emergent surgery admission on the weekend relative to weekdays (B)

**eTable 1:** Complete PubMed and EMBASE search strategies

| <b>PubMed search terms</b>                                                                                                                                                   | <b>EMBASE search terms</b>                                                                                                                                       |
|------------------------------------------------------------------------------------------------------------------------------------------------------------------------------|------------------------------------------------------------------------------------------------------------------------------------------------------------------|
| surgery OR surgical OR surgeries OR admit* OR admission* OR "patient admission"[MeSH Terms]                                                                                  | weekend* OR weekday* OR Monday OR Tuesday OR Wednesday OR Thursday OR Friday OR Saturday OR Sunday OR "day* of the week" OR "day* of week" OR "After-Hours Care" |
| AND                                                                                                                                                                          | AND                                                                                                                                                              |
| weekend* OR weekday* OR Monday OR Tuesday OR Wednesday OR Thursday OR Friday OR Saturday OR Sunday OR "day* of the week" OR "day* of week" OR "After-Hours Care"[MeSH Terms] | exp surgery OR exp hospital admission OR surgery OR surgeries OR surgical OR admit* OR admission*                                                                |
| AND                                                                                                                                                                          | AND                                                                                                                                                              |
| mortalit* OR "Mortality"[MeSH Terms] OR death* OR outcome* OR complication* OR complications[Subheading]                                                                     | exp mortality OR exp surgical mortality OR exp adverse outcome OR exp complication OR mortalit* OR death* OR complication*                                       |

**eTable 2:** Criteria for classifying risk of bias

| <b>Area of potential bias</b>       | <b>Classification procedure</b>                                                                                                                                                                                                                                                                                                                                                                                                                                                                                                                                                                                                                                                                                                                                                                                                                                                                                                    |
|-------------------------------------|------------------------------------------------------------------------------------------------------------------------------------------------------------------------------------------------------------------------------------------------------------------------------------------------------------------------------------------------------------------------------------------------------------------------------------------------------------------------------------------------------------------------------------------------------------------------------------------------------------------------------------------------------------------------------------------------------------------------------------------------------------------------------------------------------------------------------------------------------------------------------------------------------------------------------------|
| Study participation                 | Study classified as low risk of bias if all of the following criteria met:<br><ol style="list-style-type: none"><li>1) Clear inclusion and exclusion criteria.</li><li>2) Bias in elective versus urgent/emergent categorization minimized as evidenced by:<ol style="list-style-type: none"><li>a) Elective versus urgent/emergent categorization coded prospectively before study initiation; or</li><li>b) Clear and well defined procedures described to minimize bias in coding elective versus emergent status.</li></ol></li><li>3) Source population and sampling frame adequately defined.</li><li>4) Complete capture of eligible individuals or adequate procedures to minimize bias introduced by non-capture of eligible individuals.</li><li>5) No restriction by time between admission and surgery for emergency analysis (e.g. did not limit analysis to patients who had surgery on day of admission).</li></ol> |
| Attrition                           | Study classified as low risk of bias if any of the following criteria met:<br><ol style="list-style-type: none"><li>1) Study reported on in-hospital mortality.</li><li>2) Reported adequate procedures to ensure minimal loss to follow-up or reported loss to follow-up with data suggesting no important differences existed between those lost to follow-up and remainder of cohort.</li></ol>                                                                                                                                                                                                                                                                                                                                                                                                                                                                                                                                 |
| Outcome measurement                 | Study classified as low risk of bias if a clear definition of short-term mortality was applied uniformly across study participants.                                                                                                                                                                                                                                                                                                                                                                                                                                                                                                                                                                                                                                                                                                                                                                                                |
| Confounding measurement and account | Study classified as low risk of bias if all of the following potentially important confounders were accounted for (by either restriction, matching, or adjustment) in the analysis: age, sex, surgery type or procedural risk, hospital teaching status or hospital characteristics, and patient comorbid status.                                                                                                                                                                                                                                                                                                                                                                                                                                                                                                                                                                                                                  |
| Statistical analysis                | Study classified as low risk of bias if the statistical model was adequate for the study design and there was no selective reporting of pertinent results.                                                                                                                                                                                                                                                                                                                                                                                                                                                                                                                                                                                                                                                                                                                                                                         |

**eTable 3.** Risk of bias assessment

| Risk of bias*<br>by potential<br>source            | <u>Elective Surgery Studies</u> |                 |       |             |            |            |               |              |           |           | <u>Urgent/Emergent Surgery Studies</u> |             |               |                    |                   |              |            |               |              |              |                        |            |                 |                |                       |             |             |                  |            |   |
|----------------------------------------------------|---------------------------------|-----------------|-------|-------------|------------|------------|---------------|--------------|-----------|-----------|----------------------------------------|-------------|---------------|--------------------|-------------------|--------------|------------|---------------|--------------|--------------|------------------------|------------|-----------------|----------------|-----------------------|-------------|-------------|------------------|------------|---|
|                                                    | Dubois et al                    | Lagergren et al | POMRC | Vohra et al | Ruiz et al | Ruiz et al | McIsaac et al | Araujo et al | Jen et al | Tan et al | Rumalla et al                          | Hoehn et al | Ozdemir et al | Khoshchehreh et al | Kristiansen et al | Glance et al | Zapf et al | Knudsen et al | Boylan et al | Thomas et al | Karthikesalingam et al | Mell et al | Goldstein et al | Nandyala et al | Ananthakrishnan et al | Worni et al | Worni et al | Dasenbrock et al | Foss et al |   |
| <b>Participation</b>                               | H                               | L               | H     | L           | L          | L          | L             | U            | U         | U         | L                                      | L           | L             | L                  | L                 | H            | H          | L             | L            | L            | L                      | L          | L               | H              | L                     | H           | L           | L                | L          | L |
| <b>Attrition</b>                                   | L                               | L               | L     | L           | L          | L          | L             | U            | U         | L         | L                                      | L           | L             | L                  | L                 | L            | L          | L             | L            | L            | L                      | L          | L               | L              | L                     | L           | L           | L                | L          | L |
| <b>Outcome<br/>Measurement</b>                     | L                               | L               | L     | L           | L          | L          | L             | L            | U         | L         | L                                      | H           | L             | L                  | L                 | L            | L          | L             | L            | L            | L                      | L          | L               | L              | L                     | L           | L           | L                | L          | L |
| <b>Statistical<br/>Analysis</b>                    | L                               | L               | L     | L           | L          | L          | L             | L            | H         | L         | L                                      | L           | H             | L                  | L                 | L            | L          | L             | L            | L            | L                      | L          | L               | L              | L                     | L           | L           | L                | L          | L |
| <b>Confounding<br/>Measurement<br/>and account</b> | L                               | H               | H     | H           | L          | L          | L             | H            | U         | H         | L                                      | L           | H             | L                  | L                 | H            | H          | H             | L            | L            | H                      | H          | L               | H              | L                     | L           | L           | L                | L          | L |

L = low risk of bias; H = high risk of bias; U = unclear risk of bias; POMRC = Perioperative Mortality Review Committee (New Zealand)

\*Refer to Supplementary Table 2 for criteria for classifying bias

**eFigure 1.** Study selection flowchart

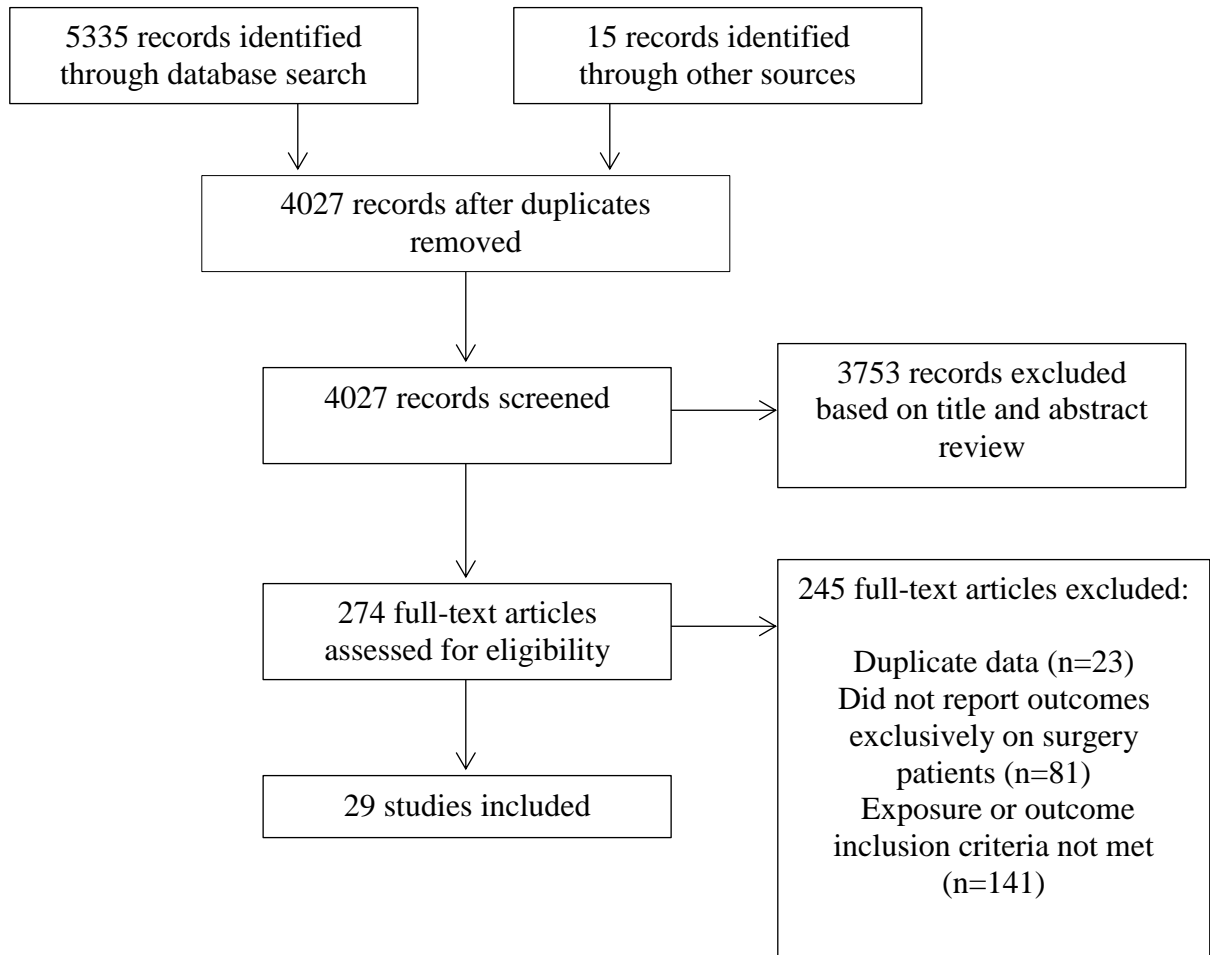

**eFigure 2.** Elective surgery sensitivity analysis incorporating results of a smaller cohort (Ruiz et al<sup>3</sup> cohort A) in the place of a larger cohort included in the main analysis (Ruiz et al<sup>22</sup>) that potentially included duplicate patients

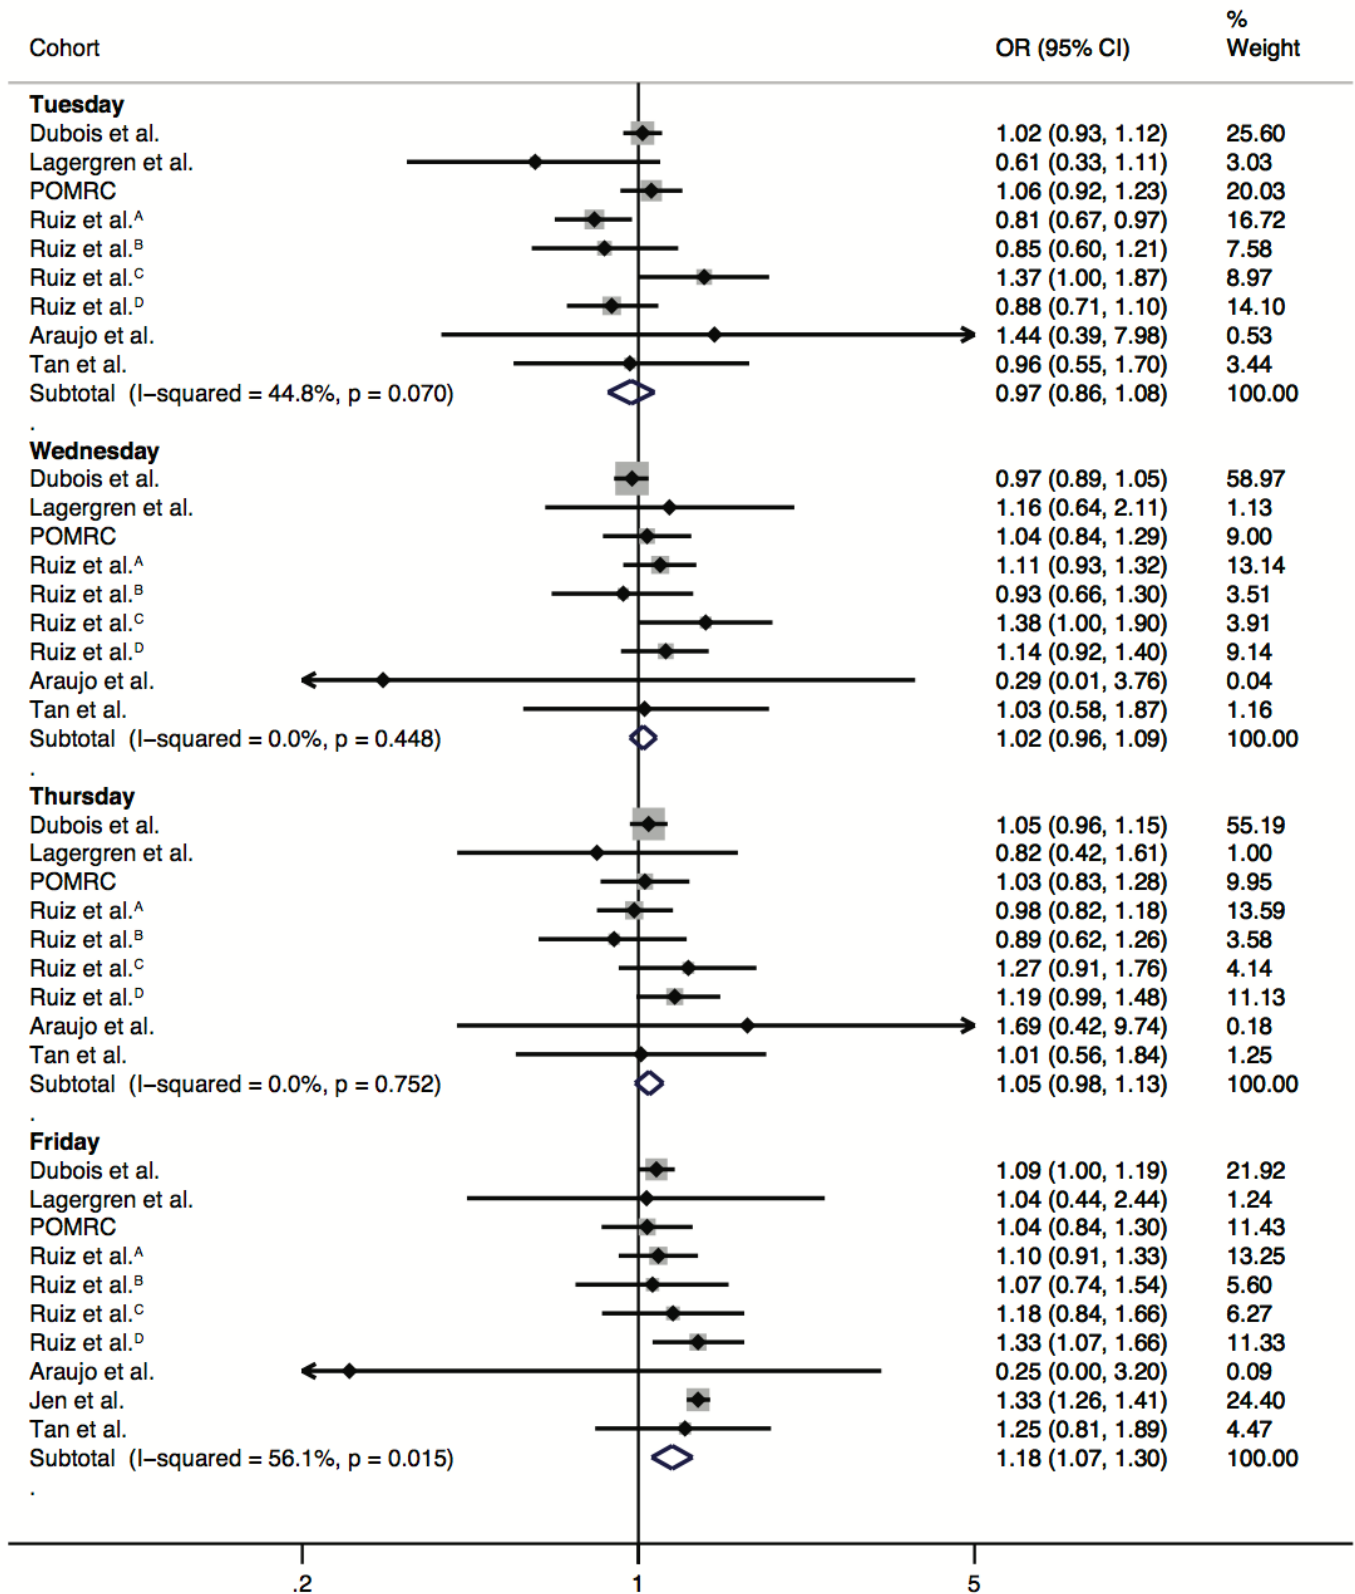

A,B,C,D Discrete cohorts from single study as specified in Table 1

**eFigure 3.** Elective surgery sensitivity analysis incorporating results of a smaller cohort (Vohra et al<sup>25</sup>) in the place of a larger cohort included in the main analysis (Ruiz et al<sup>22</sup>) that potentially included duplicate patients

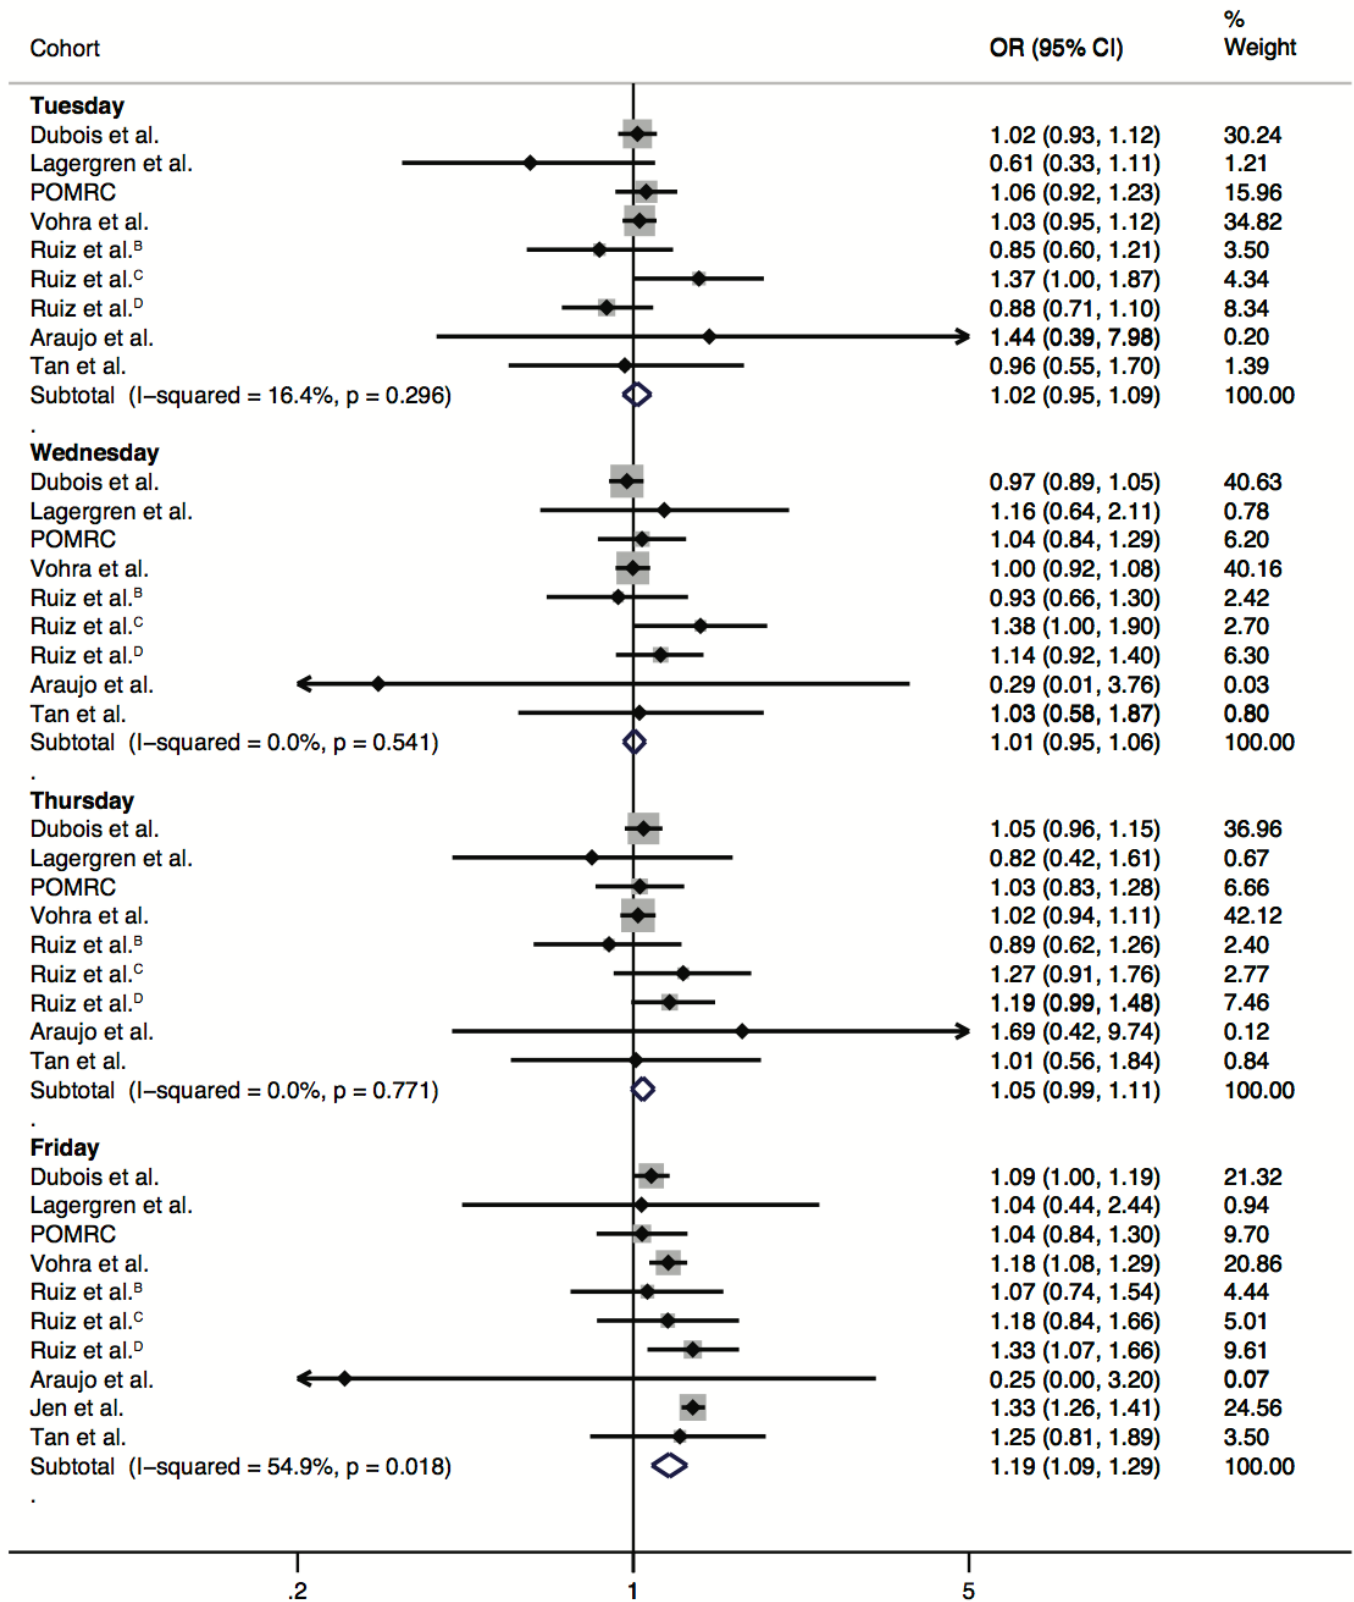

<sup>B,C,D</sup> Discrete cohorts from single study as specified in Table 1

**eFigure 4.** Elective surgery sensitivity analysis incorporating results of a smaller cohort (McIsaac et al<sup>12</sup>) in the place of a larger cohort included in the main analysis (Dubois et al<sup>31</sup>) that potentially included duplicate patients

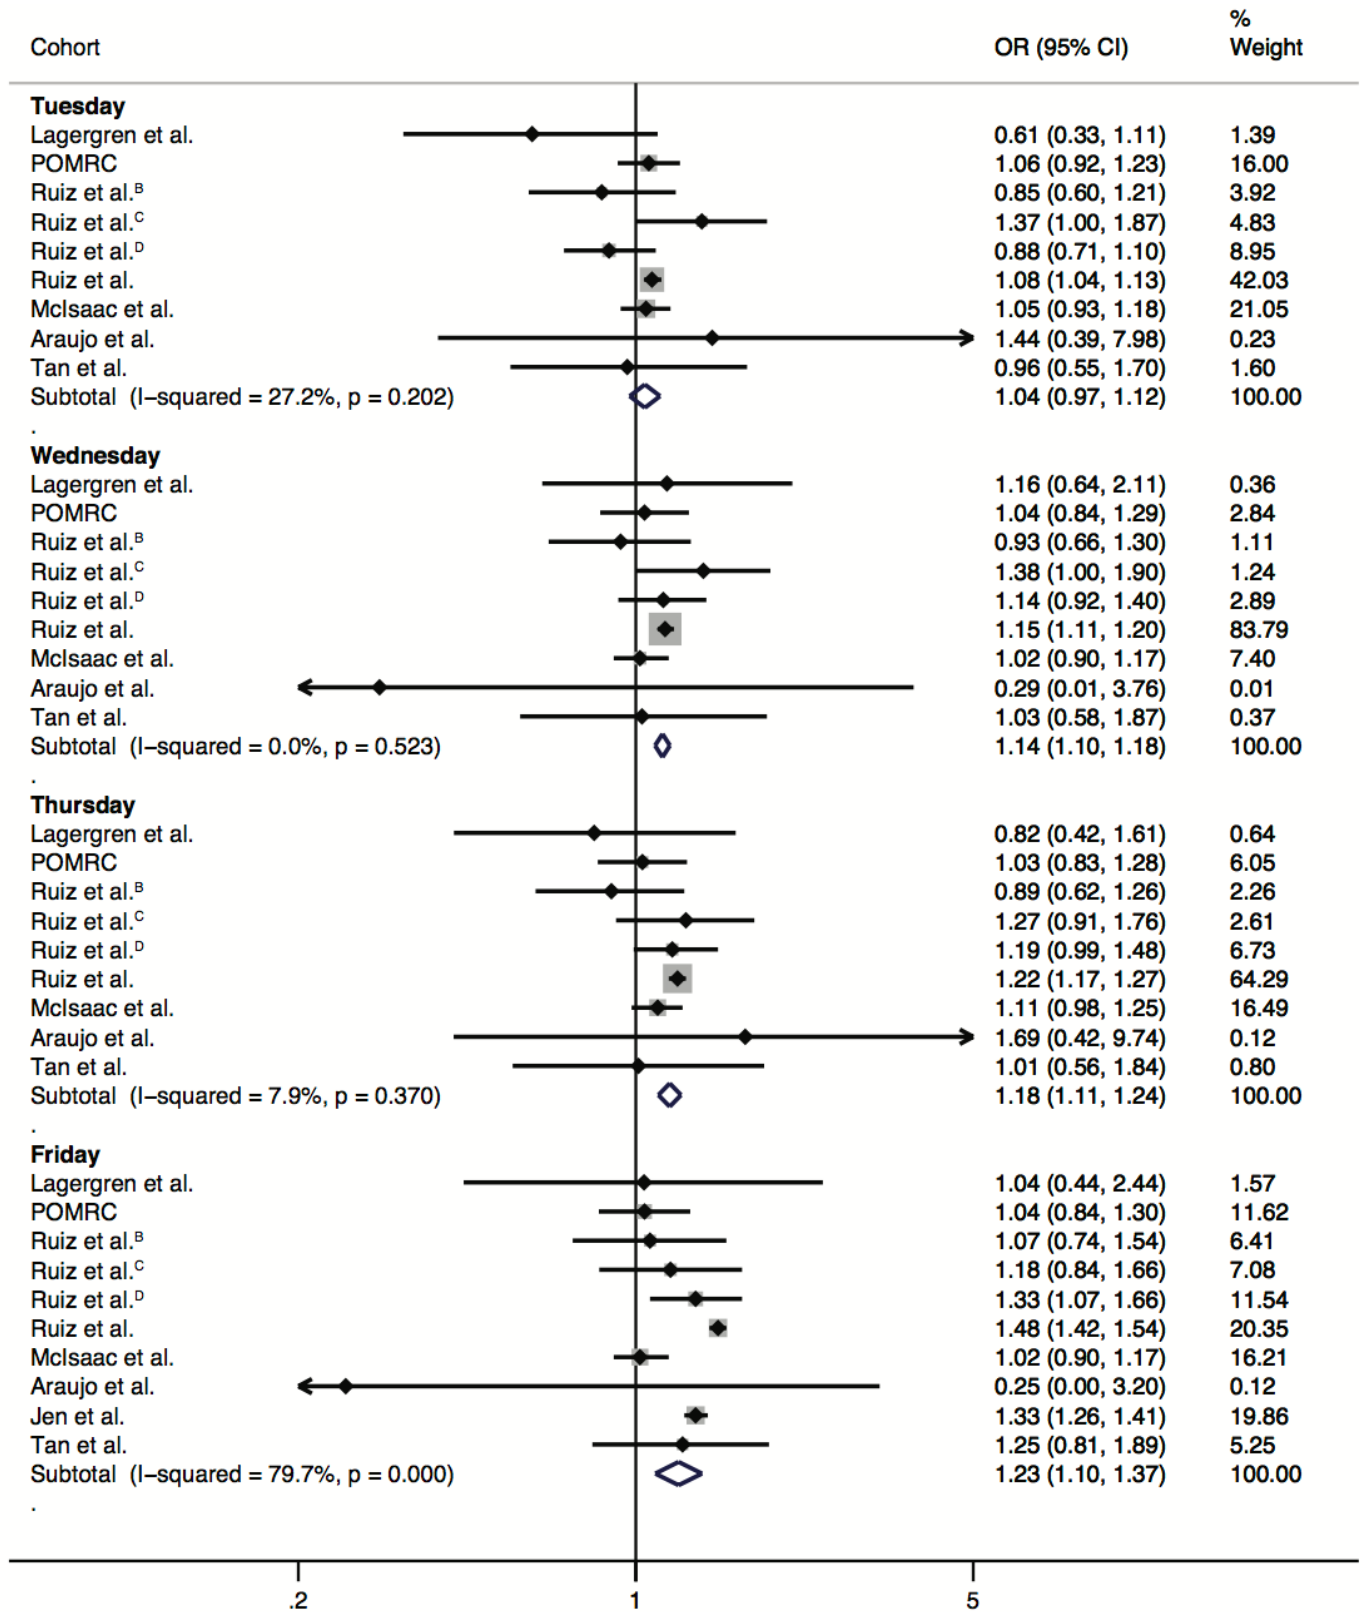



**eFigure 5.** Urgent/emergent surgery sensitivity analysis incorporating results of a smaller cohort (Glance et al<sup>8</sup>) in the place of a larger cohort included in the main analysis (Hoehn et al<sup>44</sup>) that potentially included duplicate patients

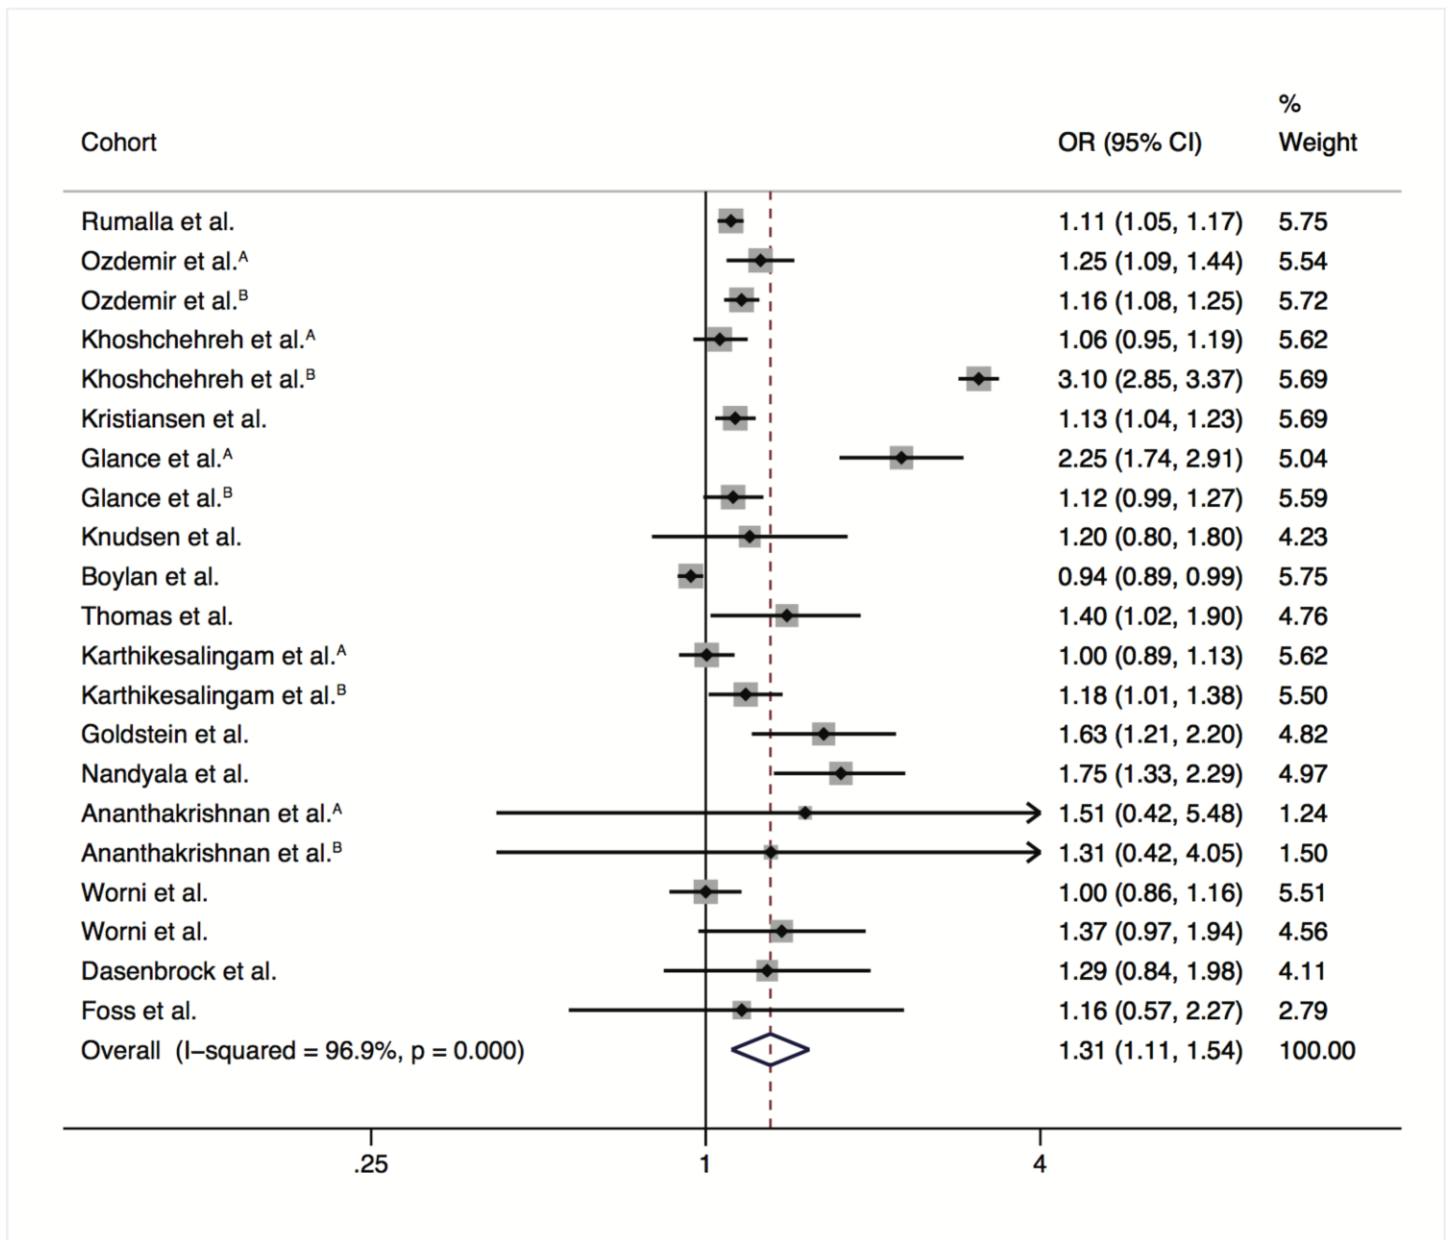

**eFigure 6.** Urgent/emergent surgery sensitivity analysis incorporating results of a smaller cohort (Zapf et al<sup>6</sup>) in the place of larger cohorts included in the main analysis (Worni et al<sup>14</sup> and Goldstein et al<sup>38</sup>) that potentially included duplicate patients

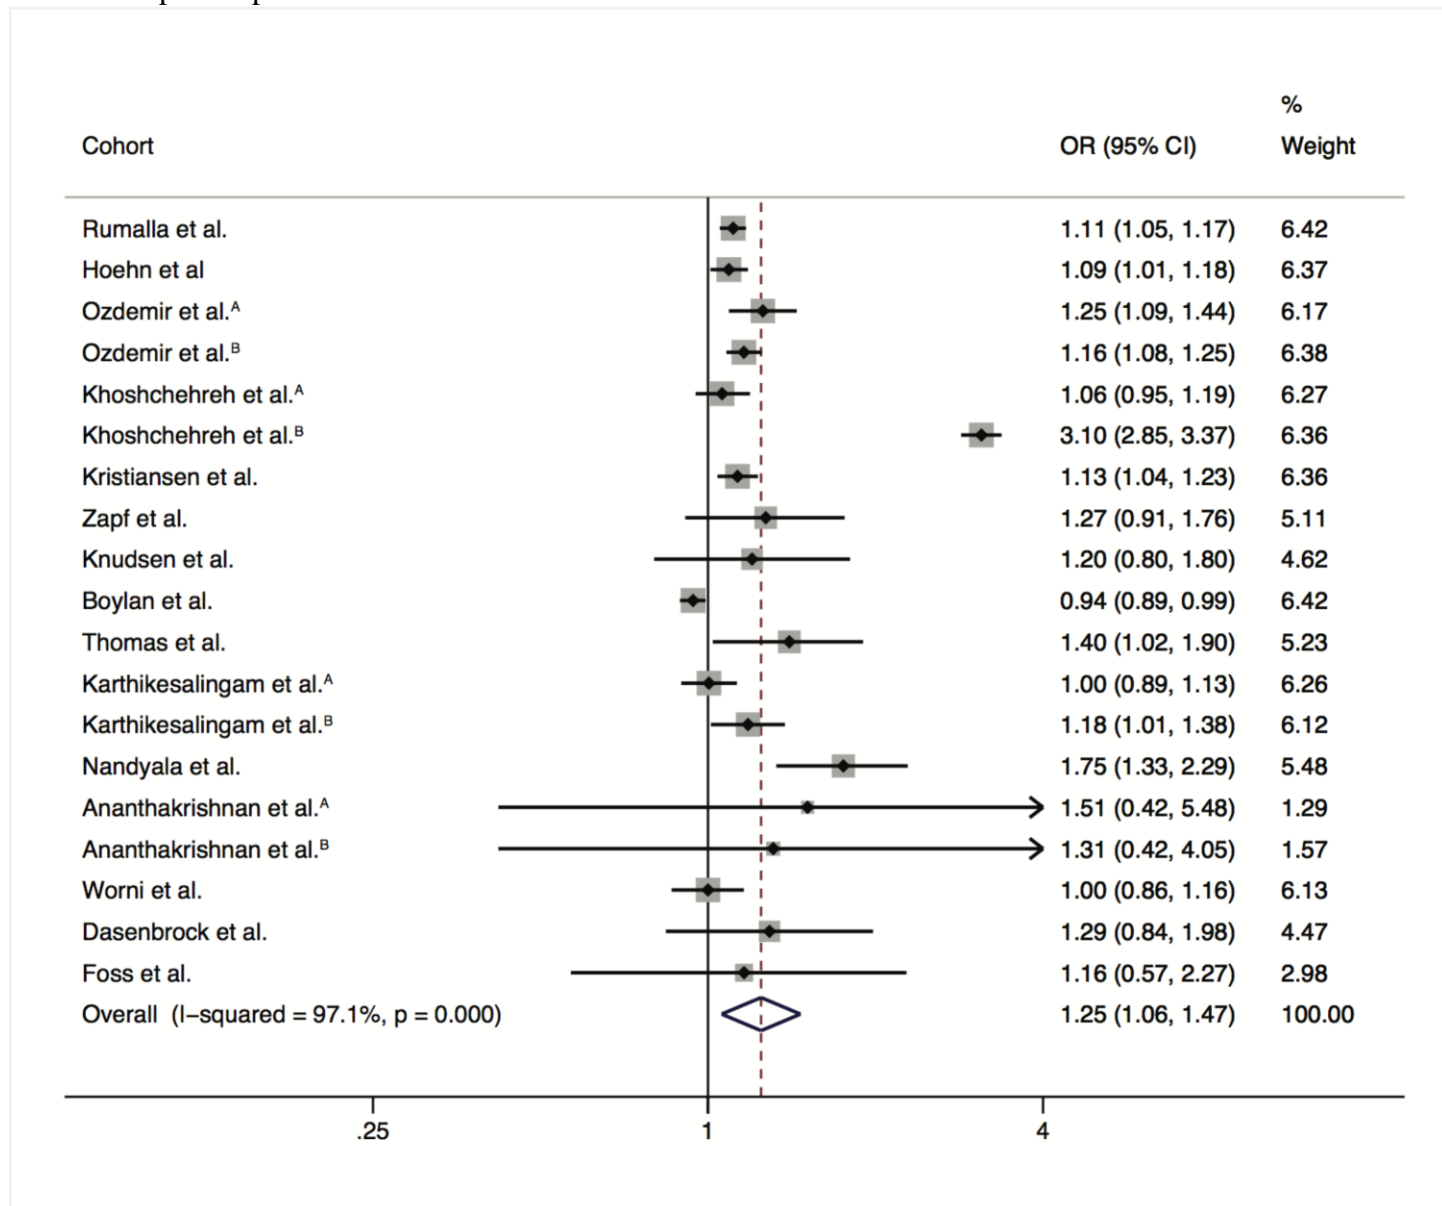

**eFigure 7.** Urgent/emergent surgery sensitivity analysis incorporating results of a smaller cohort (Mell et al<sup>33</sup>) in the place of a larger cohort (Karthikesalingam et al<sup>32</sup> cohort B) that potentially included duplicate patients

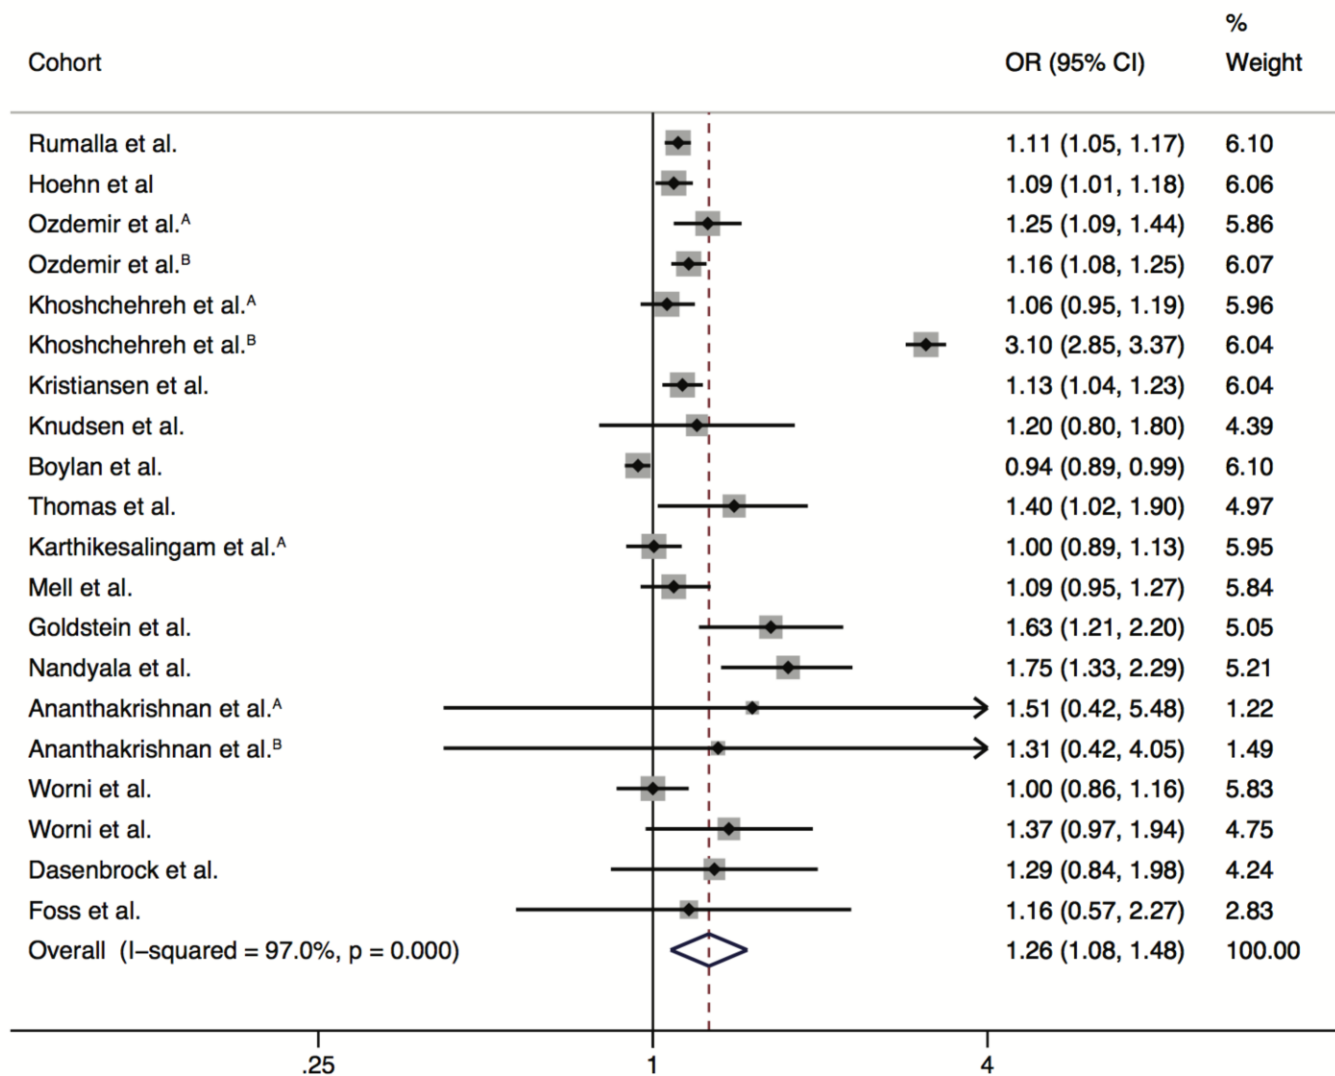

**eFigure 8.** Funnel plots of log odds ratios for mortality after elective surgery on Friday relative to Monday (A) and after admission for urgent/emergent surgery admission on the weekend relative to weekdays (B)

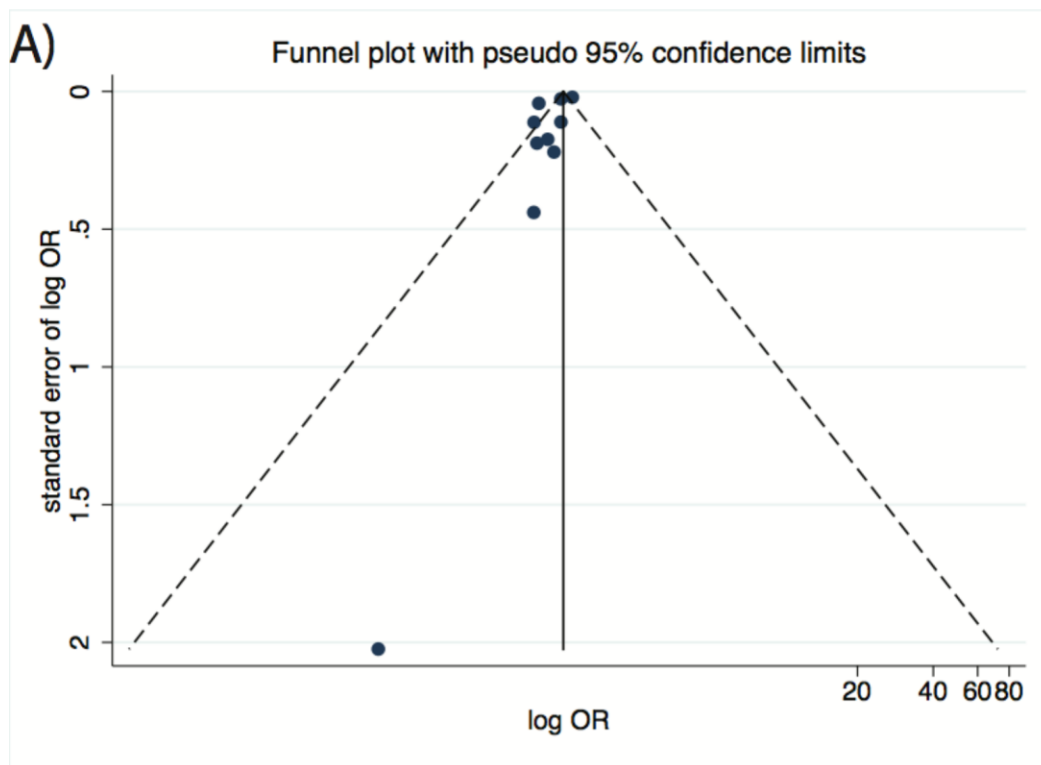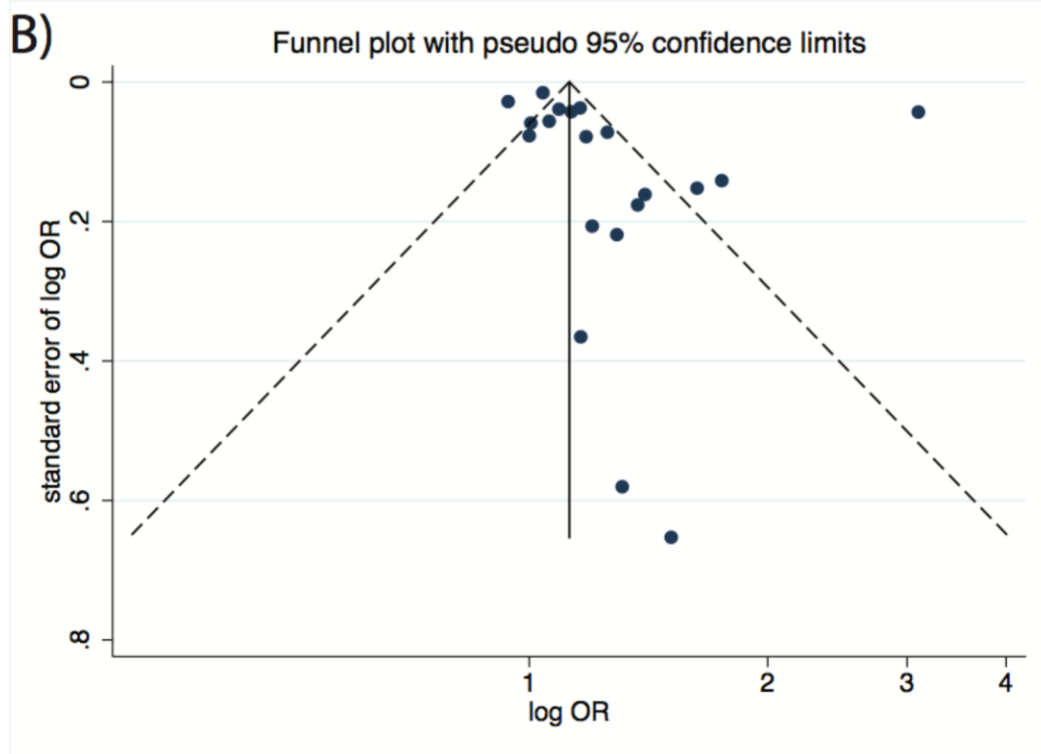

Supplement: mlr-56-121-s001.pdf [file mlr-56-121-s001.pdf]
